# Supplementary material for: Ongoing transmission of trachoma in low prevalence districts in Mozambique: results from four cross-sectional enhanced impact surveys, 2022
Source: PubMed Central journal article supplement (PMC11480103; doi:10.1038/s41598-024-71201-z), 2024-10-15
Supplement: 41598_2024_71201_MOESM1_ESM.pdf [file 41598_2024_71201_MOESM1_ESM.pdf]

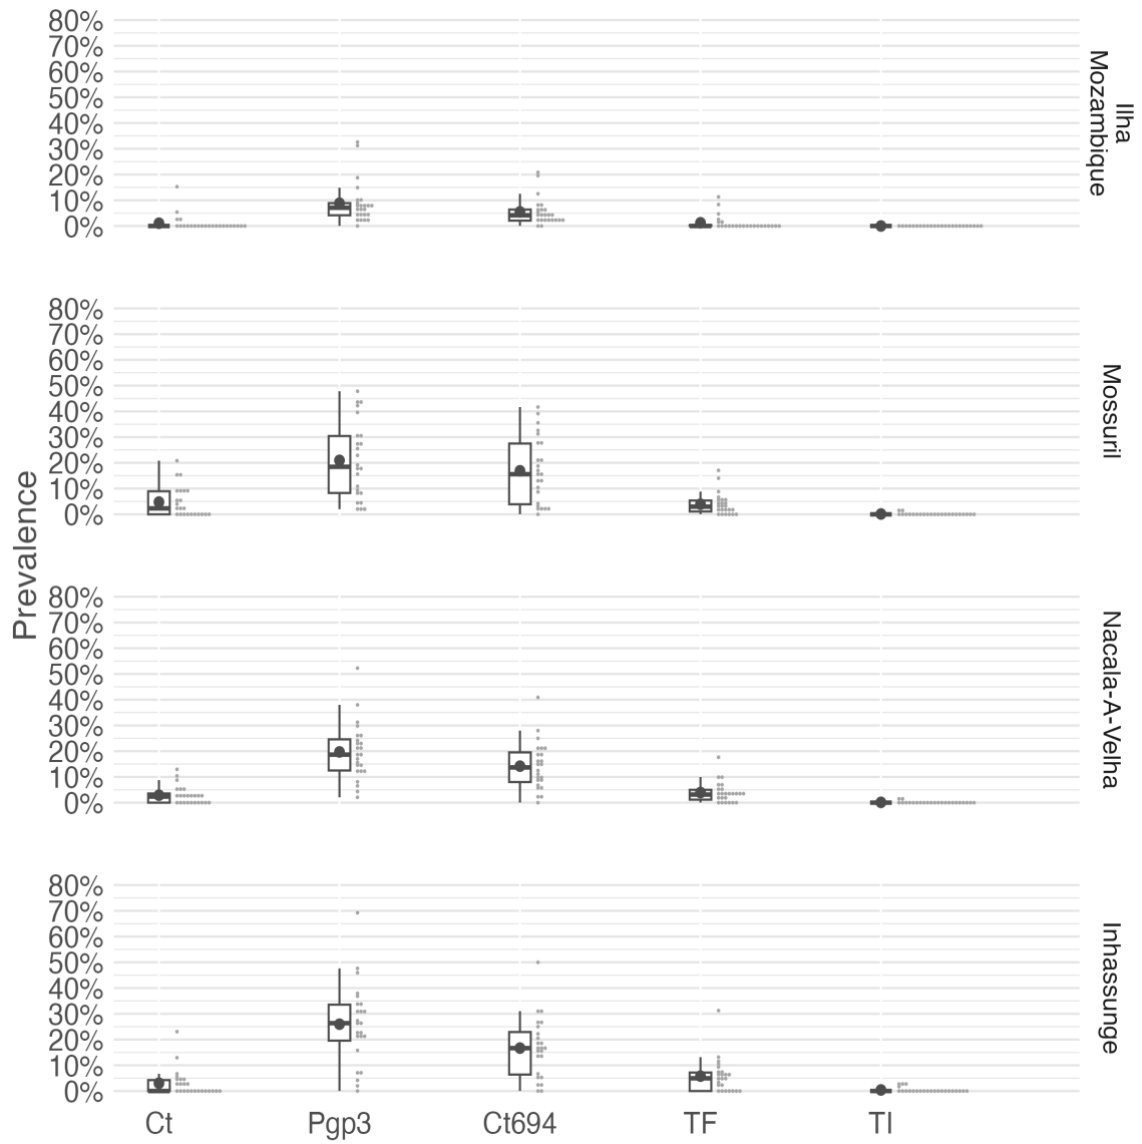

Figure S1. Distribution of cluster trachoma prevalence by district and indicator represented by box-and-whisker plots with mean cluster prevalence (dark circles) and cluster prevalence values (gray circles).

Table S1. Pgp3 seroconversion rate (SCR) by district for children aged 1–9, 1–5, and 1–3 years.

| <b>District</b>        | <b>1-9 years<br/>SCR (95% CI)</b> | <b>1-5 years<br/>SCR (95% CI)</b> | <b>1-3 years<br/>SCR (95% CI)</b> |
|------------------------|-----------------------------------|-----------------------------------|-----------------------------------|
| <b>Ilha Mozambique</b> | 1.9 (1.2–2.9)                     | 1.4 (0.6–3.3)                     | 1.2 (0.4–3.8)                     |
| <b>Mossuril</b>        | 5.0 (3.5–7.1)                     | 4.1 (2.6–6.4)                     | 4.1 (2.4–6.8)                     |
| <b>Nacala-A-Velha</b>  | 4.7 (3.6–6.1)                     | 4.0 (2.8–5.9)                     | 2.9 (1.7–5.1)                     |
| <b>Inhassunge</b>      | 6.0 (4.4–8.1)                     | 4.9 (3.3–7.2)                     | 5.0 (3.0–8.1)                     |

CI = Confidence Intervals based on robust standard errors

Table S2. District and national water, sanitation, and hygiene service level coverage (National data for 2021 available from washtdata.org).

| Location               | Households | Service Type | Basic       | Limited     | Unimproved  | No Service  |
|------------------------|------------|--------------|-------------|-------------|-------------|-------------|
|                        | N          |              | n (%)       | n (%)       | n (%)       | n (%)       |
| <b>Ilha Mozambique</b> | 836        | Water        | 586 (70.1%) | 43 (5.1%)   | 207 (24.8%) | 0 (0.0%)    |
|                        | 836        | Sanitation   | 235 (28.1%) | 13 (1.6%)   | 127 (15.2%) | 461 (55.1%) |
|                        | 836        | Hygiene      | 117 (14.0%) | 199 (23.8%) | --          | 520 (62.2%) |
| <b>Mossuril</b>        | 837        | Water        | 276 (33.0%) | 83 (9.9%)   | 214 (25.6%) | 264 (31.5%) |
|                        | 837        | Sanitation   | 42 (5.0%)   | 3 (0.4%)    | 515 (61.5%) | 277 (33.1%) |
|                        | 837        | Hygiene      | 27 (3.2%)   | 182 (21.7%) | --          | 628 (75.0%) |
| <b>Nacala-A-Velha</b>  | 837        | Water        | 329 (39.3%) | 100 (11.9%) | 307 (36.7%) | 101 (12.1%) |
|                        | 837        | Sanitation   | 109 (13.0%) | 36 (4.3%)   | 537 (64.2%) | 155 (18.5%) |
|                        | 837        | Hygiene      | 18 (2.2%)   | 171 (20.4%) | --          | 648 (77.4%) |
| <b>Inhassunge</b>      | 837        | Water        | 168 (20.1%) | 100 (11.9%) | 567 (67.7%) | 2 (0.2%)    |
|                        | 837        | Sanitation   | 42 (5.0%)   | 0 (0.0%)    | 73 (8.7%)   | 722 (86.3%) |
|                        | 837        | Hygiene      | 20 (2.4%)   | 161 (19.2%) | --          | 656 (78.4%) |
| <b>National</b>        | --         | Water        | 63.4%       | 10.0%       | 16.7%       | 9.9%        |
|                        | --         | Sanitation   | 37.2%       | 5.0%        | 37.1%       | 20.7%       |
|                        | --         | Hygiene      | 12.2%       | 32.5%       | --          | 55.3%       |

Table S3. Frequency of collection time  $\leq 30$  minutes by water source and district, among N=3,347 households

| Source         | $\leq 30$ min | Districts                |                   |                         |                     |
|----------------|---------------|--------------------------|-------------------|-------------------------|---------------------|
|                |               | Ilha Mozambique<br>n (%) | Mossuril<br>n (%) | Nacala-A-Velha<br>n (%) | Inhassunge<br>n (%) |
| Drinking water | No            | 171 (20.5%)              | 447 (53.4%)       | 387 (46.2%)             | 229 (27.4%)         |
|                | Yes           | 665 (79.5%)              | 390 (46.6%)       | 450 (53.8%)             | 608 (72.6%)         |
| Washing water  | No            | 171 (20.5%)              | 466 (55.7%)       | 384 (45.9%)             | 219 (26.2%)         |
|                | Yes           | 665 (79.5%)              | 371 (44.3%)       | 453 (54.1%)             | 618 (73.8%)         |
